# Supplementary material
Source: PubMed Central journal article supplement (PMC3374909)
Supplement: NIHMS360630-supplement-Supp_TableS1-S2_FigureS1.pdf [file NIHMS360630-supplement-Supp_TableS1-S2_FigureS1.pdf]

**Supplementary Data Table 1:** Analysis of mRNA expression levels in the mammary gland of ACI rats

|                            | 2 weeks                |                                |                                | 10 weeks               |                                |                                |
|----------------------------|------------------------|--------------------------------|--------------------------------|------------------------|--------------------------------|--------------------------------|
|                            | E <sub>2</sub> Control | E <sub>2</sub> + 0.3%<br>γ-TmT | E <sub>2</sub> + 0.5%<br>γ-TmT | E <sub>2</sub> Control | E <sub>2</sub> + 0.3%<br>γ-TmT | E <sub>2</sub> + 0.5%<br>γ-TmT |
| <b>Nrf2 Pathway</b>        |                        |                                |                                |                        |                                |                                |
| <b>Nrf2</b>                | 1.0 ± 0.4              | 1.2 ± 0.3                      | 1.2 ± 0.5                      | 1.0 ± 0.1              | 0.7 ± 0.1                      | 1.0 ± 0.1                      |
| <b>Keap1</b>               | 1.0 ± 0.1              | 0.8 ± 0.2                      | 0.7 ± 0.2                      | 1.0 ± 0.1              | 0.8 ± 0.1                      | 0.7 ± 0.1                      |
| <b>Phase I Enzymes</b>     |                        |                                |                                |                        |                                |                                |
| <b>Cyp 1A1</b>             | 1.0 ± 0.1              | 1.0 ± 0.3                      | 0.8 ± 0.1                      | 1.0 ± 0.1              | 0.3 ± 0.2*                     | 0.5 ± 0.2                      |
| <b>Cyp 1B1</b>             | 1.0 ± 0.1              | 0.9 ± 0.1                      | 1.0 ± 0.3                      | 1.0 ± 0.3              | 0.8 ± 0.1                      | 0.8 ± 0.4                      |
| <b>Phase 2 Enzymes</b>     |                        |                                |                                |                        |                                |                                |
| <b>UGT1A1</b>              | 1.0 ± 0.2              | 1.8 ± 0.1*                     | 1.6 ± 0.3                      | 1.0 ± 0.1              | 1.8 ± 0.1 <sup>†</sup>         | 1.6 ± 0.2                      |
| <b>NQO1</b>                | 1.0 ± 0.1              | 1.2 ± 0.1                      | 1.1 ± 0.2                      | 1.0 ± 0.2              | 1.1 ± 0.2                      | 1.1 ± 0.1                      |
| <b>GSTm1</b>               | 1.0 ± 0.1              | 1.9 ± 0.3*                     | 2.4 ± 0.2 <sup>‡</sup>         | 1.0 ± 0.1              | 1.3 ± 0.3                      | 1.7 ± 0.4                      |
| <b>LOC5011</b>             | 1.0 ± 0.2              | 2.8 ± 0.1 <sup>‡</sup>         | 2.3 ± 0.3*                     | 1.0 ± 0.1              | 1.2 ± 0.2                      | 1.4 ± 0.2                      |
| <b>COMT</b>                | 1.0 ± 0.1              | 1.5 ± 0.1*                     | 1.6 ± 0.1*                     | 1.0 ± 0.2              | 1.2 ± 0.2                      | 1.6 ± 0.5                      |
| <b>GClm</b>                | 1.0 ± 0.1              | 0.9 ± 0.2                      | 0.9 ± 0.2                      | 1.0 ± 0.3              | 1.0 ± 0.5                      | 1.4 ± 0.5                      |
| <b>Antioxidant Enzymes</b> |                        |                                |                                |                        |                                |                                |
| <b>SOD1</b>                | 1.0 ± 0.2              | 1.2 ± 0.1                      | 0.7 ± 0.2                      | 1.0 ± 0.1              | 1.1 ± 0.3                      | 1.2 ± 0.2                      |
| <b>GPX1</b>                | 1.0 ± 0.2              | 1.2 ± 0.2                      | 1.7 ± 0.5                      | 1.0 ± 0.1              | 1.0 ± 0.1                      | 1.5 ± 0.6                      |
| <b>HO-1</b>                | 1.0 ± 0.2              | 1.2 ± 0.1                      | 1.0 ± 0.2                      | 1.0 ± 0.2              | 1.2 ± 0.2                      | 1.2 ± 0.3                      |
| <b>TXN1</b>                | 1.0 ± 0.2              | 1.0 ± 0.1                      | 0.9 ± 0.2                      | 1.0 ± 0.1              | 0.9 ± 0.2                      | 1.2 ± 0.3                      |
| <b>Catalase</b>            | 1.0 ± 0.2              | 0.8 ± 0.2                      | 0.7 ± 0.1                      | 1.0 ± 0.1              | 0.7 ± 0.2                      | 0.7 ± 0.2                      |

ACI rats treated with estrogen pellets were fed the control, 0.3%, or 0.5% γ-TmT diet. A mammary gland from each rat was analyzed for mRNA levels by quantitative PCR (n = 2-6). The values are represented as mean ± S.E.M. Statistical significance, \*p<0.05, <sup>†</sup>p<0.01, <sup>‡</sup>p<0.001.

**Supplementary Data Table 2:** Analysis of mRNA expression levels in the liver of ACI rats

|                            | 2 weeks                |                                |                                | 10 weeks               |                                |                                |
|----------------------------|------------------------|--------------------------------|--------------------------------|------------------------|--------------------------------|--------------------------------|
|                            | E <sub>2</sub> Control | E <sub>2</sub> + 0.3%<br>γ-TmT | E <sub>2</sub> + 0.5%<br>γ-TmT | E <sub>2</sub> Control | E <sub>2</sub> + 0.3%<br>γ-TmT | E <sub>2</sub> + 0.5%<br>γ-TmT |
| <b>Nrf2 Pathway</b>        |                        |                                |                                |                        |                                |                                |
| <b>Nrf2</b>                | 1.0 ± 0.1              | 0.9 ± 0.1                      | 1.0 ± 0.1                      | 1.0 ± 0.1              | 1.0 ± 0.1                      | 0.8 ± 0.1                      |
| <b>Keap1</b>               | 1.0 ± 0.1              | 1.1 ± 0.1                      | 1.0 ± 0.1                      | 1.0 ± 0.1              | 1.1 ± 0.2                      | 1.0 ± 0.1                      |
| <b>Phase I Enzymes</b>     |                        |                                |                                |                        |                                |                                |
| <b>Cyp 1A1</b>             | 1.0 ± 0.2              | 1.4 ± 0.2                      | 1.1 ± 0.2                      | 1.0 ± 0.2              | 0.5 ± 0.1                      | 1.8 ± 0.7                      |
| <b>Cyp 1B1</b>             | 1.0 ± 0.2              | 0.7 ± 0.1                      | 1.0 ± 0.2                      | 1.0 ± 0.2              | 1.0 ± 0.5                      | 3.2 ± 0.5*                     |
| <b>Phase 2 Enzymes</b>     |                        |                                |                                |                        |                                |                                |
| <b>UGT1A1</b>              | 1.0 ± 0.2              | 1.4 ± 0.2                      | 1.3 ± 0.1                      | 1.0 ± 0.1              | 1.8 ± 0.1 <sup>†</sup>         | 1.6 ± 0.1 <sup>†</sup>         |
| <b>NQO1</b>                | 1.0 ± 0.1              | 2.8 ± 0.2 <sup>‡</sup>         | 2.6 ± 0.3 <sup>‡</sup>         | 1.0 ± 0.1              | 1.3 ± 0.3                      | 1.5 ± 0.8*                     |
| <b>GSTm1</b>               | 1.0 ± 0.1              | 2.0 ± 0.2 <sup>‡</sup>         | 1.8 ± 0.2 <sup>†</sup>         | 1.0 ± 0.1              | 1.5 ± 0.2                      | 1.7 ± 0.2                      |
| <b>LOC5O11</b>             | 1.0 ± 0.1              | 0.9 ± 0.1                      | 1.0 ± 0.1                      | 1.0 ± 0.1              | 1.1 ± 0.1                      | 1.1 ± 0.1                      |
| <b>COMT</b>                | 1.0 ± 0.1              | 0.9 ± 0.1                      | 0.9 ± 0.1                      | 1.0 ± 0.1              | 1.1 ± 0.2                      | 1.2 ± 0.2                      |
| <b>GClm</b>                | 1.0 ± 0.1              | 2.0 ± 0.3 <sup>†</sup>         | 2.3 ± 0.2 <sup>‡</sup>         | 1.0 ± 0.1              | 1.4 ± 0.2                      | 1.3 ± 0.9                      |
| <b>Antioxidant Enzymes</b> |                        |                                |                                |                        |                                |                                |
| <b>SOD1</b>                | 1.0 ± 0.1              | 0.9 ± 0.1                      | 0.8 ± 0.1                      | 1.0 ± 0.1              | 1.1 ± 0.1                      | 1.3 ± 0.1                      |
| <b>GPX1</b>                | 1.0 ± 0.2              | 1.5 ± 0.2                      | 1.3 ± 0.2                      | 1.0 ± 0.1              | 0.8 ± 0.1                      | 1.2 ± 0.0                      |
| <b>HO-1</b>                | 1.0 ± 0.1              | 0.9 ± 0.1                      | 1.1 ± 0.2                      | 1.0 ± 0.1              | 1.2 ± 0.3                      | 1.3 ± 0.0*                     |
| <b>TXN1</b>                | 1.0 ± 0.1              | 1.2 ± 0.1                      | 1.2 ± 0.1                      | 1.0 ± 0.1              | 1.1 ± 0.3                      | 1.3 ± 0.0                      |
| <b>Catalase</b>            | 1.0 ± 0.1              | 1.2 ± 0.1                      | 1.1 ± 0.1                      | 1.0 ± 0.1              | 1.2 ± 0.3                      | 1.3 ± 0.1                      |

ACI rats treated with estrogen pellets were fed the control, 0.3%, or 0.5% γ-TmT diet. Liver from each rat was analyzed for mRNA levels by quantitative PCR (n=2-6). The values are represented as mean ± S.E.M. Statistical significance, \*p<0.05, <sup>†</sup>p<0.01, <sup>‡</sup>p<0.001.

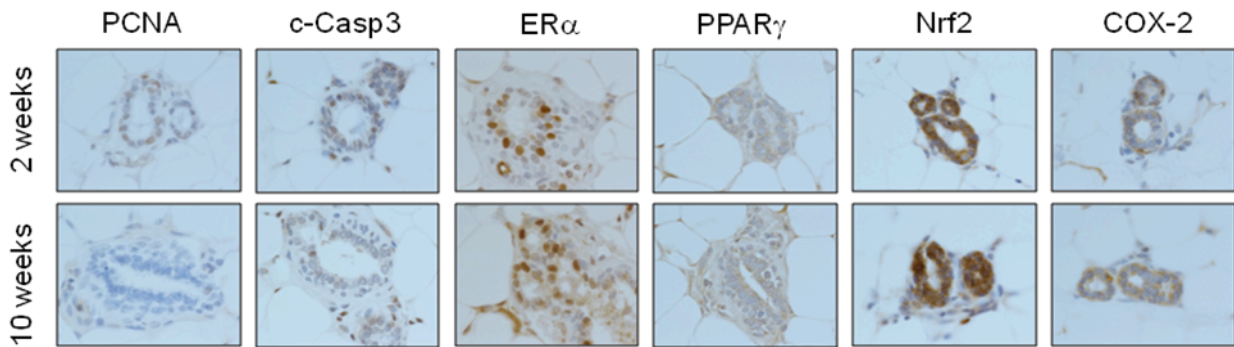

**Supplementary Figure 1:** ACI rats treated with control pellets were fed the control AIN-93M diet. A representative immunostaining of PCNA, c-Casp3, ER $\alpha$ , PPAR $\gamma$ , Nrf2, and COX-2 in the mammary gland is shown (600x). Positive staining of PCNA, ER $\alpha$  and PPAR $\gamma$  is found in the nuclei of the cells. Positive staining of c-Casp3 is shown as a light brown to dark brown precipitate in the cytoplasm or perinuclei of the cells. Positive staining for Nrf2 is found both in the cytoplasm and nuclei of the cells. Positive staining for COX-2 is found in the cytoplasm.
